# Supplementary material for: Exposure to Yersinia pestis increases resistance to plague in black rats and modulates transmission in Madagascar
Source: PubMed Central journal article supplement (PMC6295079; doi:10.1186/s13104-018-3984-3), 2018-12-14
Supplement: 13104_2018_3984_MOESM1_ESM.pdf [file 13104_2018_3984_MOESM1_ESM.pdf]

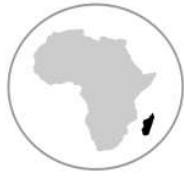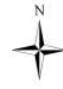

Mozambique  
Channel

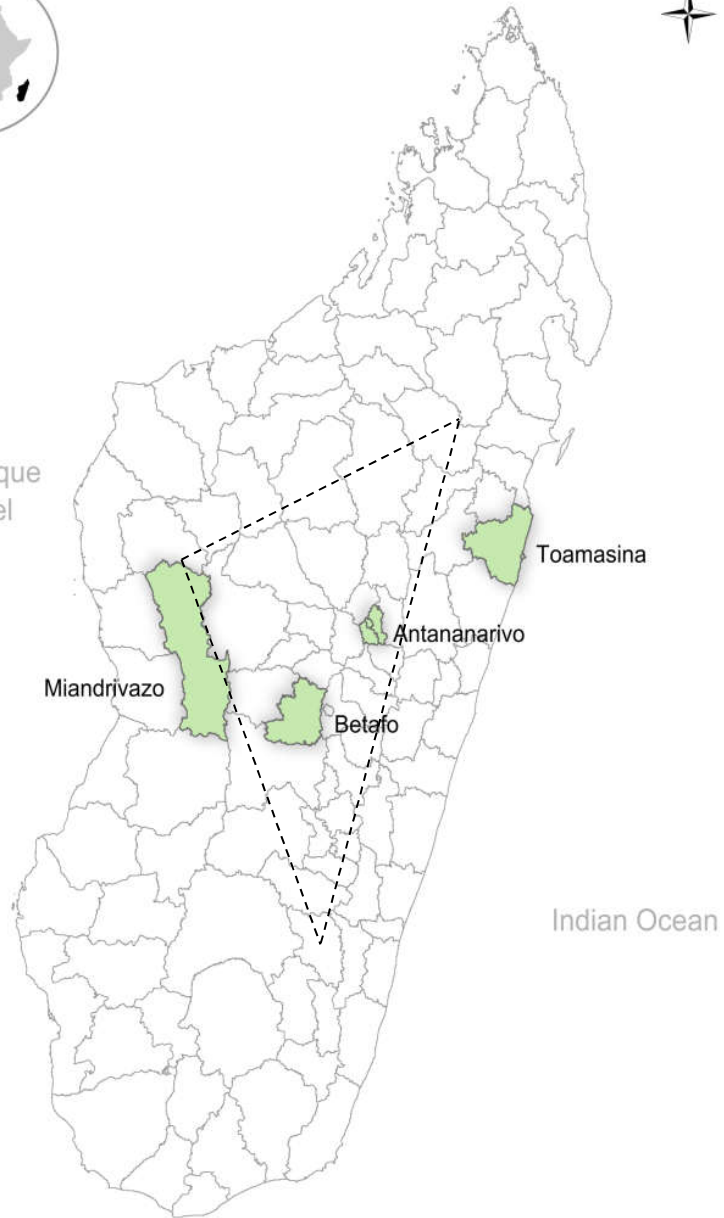

Toamasina

Antananarivo

Miandrivazo

Betafo

Indian Ocean

0 150 Km
